# Supplementary material
Source: publisher figshare collection journal article supplement (https://brill.figshare.com/ndownloader/files/13726100)
Supplement: Supplementary file 1 [file 13726100]

# Venezia

**Isola di san Michele**

**Biblioteca dei Frati Francescani (POKk p.876)**

**H.42 (old signature) xiv** (wm 1331-66)

[Ad Her] comm E (Bartolinus; ‘fas non est nec umquam fuit quicquam nisi optimum …’ / ‘[*etsi negociis etc*.] visis hiis que requiruntur in principio huius libri, descendendum est ad libri divisionem que dicitur forma tractatus …’; 231 fols, 222-30 lacking; misbound, see Wertis *Viator* 10 [1979] 300-301 n.41; J.B.Mittarellius *Bibl. Codicum MSS Monast.S.Michaelis Venetiarum prope Murianum* [Ven. 1779] p.257 ‘in libros Rhetoricorum ad Herennium, notae’, cod. in 8, parch. xv num.959)

# Venezia

# Biblioteca Nazionale Marciana (these MSS are often preceded by some words / sigla such as ‘Marc. Lat.’ or ‘lat.cl’ or ‘cl.’)

**4757 (It. Z.75) xv**

[Ad Her] trans/para-ital* (‘quella magna dignità, dillectissimo fradello…’; Speroni ‘Intorno…’ p.25 n.1)

# Venezia

# Biblioteca Nazionale Marciana

**6063 (it.VIII.18) xv**

# [Ad Her] trans/para-ital*

# Venezia

# Biblioteca Nazionale Marciana

**6090 (it.VIII.26) xv**

# [Ad Her] trans/para-ital* (‘compilazione di rhetorica trata del tesoro e della compilatione de missere Buono Giamboni et de la compilatione de frate Guidotto da Bologna…’; Speroni [1994] LXXV)

# Venezia

# Biblioteca Nazionale Marciana

**6168 (it.VIII.17) xiv**

[Ad Her] trans/para-ital*

# Venezia

# Biblioteca Nazionale Marciana

**6951 (it.X.21) xiv**

[Ad Her / De inv (?)] trans/para-ital* (cf. note at end: ‘dalla quale apparisce che questo copista pensava assai diversamente da quello che il frate che abbiamo ricordato nel capitolo primo, che tolse il secondo trattato, poichè scrive: “procuro io per continuare questa parte. In questo libro o poco innanzi della rettorica vecchia di Tullio volgarizzata per frate Guidotto da Bologna, e appresso la rettorica nova volgarizzata per lo ditto frate … che ser Brunetto non condusse a compimento e frate Guidotto considerando l’altrui difetto, ne tratasciò e massimamente nella parte più necessaria siccome egli stesso [dice?] cioè negli argomenti che provano la intenzione …. dunque è questo massimamente necessario senza il quale fare non si puote … epperciò in questa [? –o?] luogo appieno trattando del tesoro che in francioso fu compilato per lo ditto ser Brunetto … chè non paia una parte mozzicata leggerai fino qui et sarai a questo segno in questa di frate Guidotto, e così continuerai fino alla fine dove è un altro segno continuativo…’; Speroni [1994] CVII)

[Ad Her] exord/ital*

# Venezia

# Biblioteca Nazionale Marciana

**7568 (it.X.124) xv**

[Ad Her] trans/para-ital*

# Venezia

# Biblioteca Nazionale Marciana

**XI, 11 (4081) xiv** (Catalogo Zorzanello POKk p.873) says ‘**xv**’)

[Ad Her] comm (Bartolinus; ‘felix qui potuit cognoscere causas Virgillius …’ / [*etsi negociis etc.*] docent artis scriptores illud in principio cuiuscumque orationis …’)

# Venezia

# Biblioteca Nazionale Marciana

**XI, 15 (3812) xv** (Catalogo Zorzanello POKk p.873) says ‘o **xiv?**’)

[De inv] comm (f.39rb [the whole text is fols 1-39rb, 41ra-57rb] ‘Donati explanationum in retoricis liber primus explicit’, yet f.57rb ‘Donati’ has been erased and replaced by ‘Victorini’ [in a more or less contemporary h?], and in fact the text = Victorinus)

[De inv comm (Victorinus)] s-gl

[De inv] comm E (‘cum sint…’, described in the MS as the beginning of bk 2 of Victorinus; fols 39rb-41ra)

[De inv] comm E (on bk 1 proemium, announced after explicit to Victorinus bk 2 f.57rb as’argumentum’, but in fact = Grillius, ed. Martin pp.1-7.18: ‘incipientes aliquam rem scribere primus eam commendare debemus ut Virgilius admiranda …’, and concluded by [f.58rb] ‘finis Victorini compendium de rethorica’ [see next work]; fols 57rb-58rb)

[De inv] cn (announced as ‘Victorini compendium de rethorica’, inc. ‘materies rethorice duplex est ubi et unde fiat oratio…’; fols 58rb- 65vb)

# Venezia

# Biblioteca Nazionale Marciana

**XI, 23 (4686) xii** (Zorzanello ‘**xiii**’, MO I p.330 ‘**xii-xiii**’)

[De inv] comm (anon; see Ward in Calboli ed*. Papers on Rhetoric* V; inc.‘ista videnda sunt circa artem rethoricam quid ipsa sit …’ / [*sepe et multum etc.]* *sepe* id est in multis temporibus set quia posset frequenter cogitare…’; fols 1-40va)

[Ad Her] comm incompl (probably by Petrus Helias, or an early version of the ‘Alanus’ group; see Ward in Calboli ed. *Papers on Rhetoric* V; ‘explanatio in rhetoricen Ciceronis ad Herennium [red] / [*etsi*] ea que ad artem extrinsecus pertinere videntur diligenter in superioribus glosulis prime rethorice…’ [possibly an argument that the two glosses in this MS are by the same person, though our known *De inv* comm of Petrus Helias is not the same as the work above] / ‘[etsi in ne(gotiis)] statim in principio captat benivolentiam a propria persona cum pro amico…’; fols 41-76; cf. MS Uppsala Univbibl. C 928 for a frg from the same commentary).

# Venezia

# Biblioteca Nazionale Marciana

**XI, 34 (4354) xv (1471)**

[Ad Her E] exord (Barzizza)

[Ad Her] comm incompl (anon.; inc. ‘[*etsi … suppeditare possumus*] hic posset aliquis Ciceroni obicere quod contra affectum facit…’)

# Venezia

# Biblioteca Nazionale Marciana

**XI, 42a (4084) xv**

De inv

# Venezia

# Biblioteca Nazionale Marciana

**XI, 42b (4112) xv**

De inv

[De inv] mi/s-gl (‘odium est impraecatio mali…’ in several hh but mostly a small contemporary [scribal?] h)

Ad Her

[Ad Her] s-gl (‘[*negocium*] i.e. quasi negans ocium …’ / ‘arrogantia species est superbie, arrogans qui sibi soli omnia arrogat et preter se neminem existimat …’ / ‘in diffinitione officii materiam artis et finis comprehenditur …’; not in the h of the De inv glossator)

# Venezia

# Biblioteca Nazionale Marciana

**XI, 43 (3815) xv**

De inv

[De inv] mi-gl (‘summam et totalitatem …’; parts erased or worn away)

Ad Her

[Ad Her] s-gl (really starts at bk 3; same h as De inv text and comm)

# Venezia

# Biblioteca Nazionale Marciana

**XI, 44 (4187) xv**

Ad Her

[Ad Her] mi-gl (a minor informal gloss in many hh beginning ‘premittit intentionem [?] et causas captans benivolentiam dicens “licet sim occupatus”…’ / ‘rhetorica est ratio dicendi; rhetorica est potentia dicendi circa unumquodque contingens persua[si]bilium; rhetorica est scientia dicendi apposite ad persuadendum. Quintilianus in libro declamationum, Cassiodorus VIII Variarum …’ / [on the first two lines of the text] ‘quod testatur in libro offitiorum et alibi …’; cites ‘Allanus’ on early fols)

# Venezia

# Biblioteca Nazionale Marciana

**XI, 45 (3930) xv** (fol.50, a problematic part of the volume, bears the date **1426**)

Ad Her

[Ad Her] m/s-gl (in many hh, informal with some formal characteristics; inc. ‘iste liber dividitur in quatuor libros, in primo tractat de exordiorum et narrationum generibus, in secundo de confirmatione, confutatione et conclusionum generibus…’ / ‘nota quod ‘quamvis’ et ‘tamen’ sunt coniunciones adversative se habentes unam per ‘prius’ videlicet ‘quamvis’ et alteram per ‘posterius’ videlicet ‘tamen’ …’)

# Venezia

# Biblioteca Nazionale Marciana

**XI, 46 (3966) xv (1445)**

De inv

Ad Her

glossed?

# Venezia

# Biblioteca Nazionale Marciana

**XI, 48 (3826) xv**

[De inv] comm (Victorinus)

[De inv] comm E (‘cum sint…’)

# Venezia

# Biblioteca Nazionale Marciana

**XI, 68 (4430) xv**

Ad Her

[Ad Her] s-gl

[Ad Her E] ex (Marbod; not in Leotta: only the name of the *color* and the verses; not prose definitions. Ends on ‘tu mihi te confer … non placet illud’)

# Venezia

# Biblioteca Nazionale Marciana

**XI, 86 (3817) xv** (occasional note and correction but basically not glossed)

Ad Her

De inv

# Venezia

# Biblioteca Nazionale Marciana

**XI, 100 (3938) xv**

[Ad Her E] exord (Barzizza)

# Venezia

# Biblioteca Nazionale Marciana

**XI, 143 (4118) xiv (1335-38)**

Ad Her

[Ad Her] s-gl (inc. ‘est negotium quasi negans ocium…’ / ‘*etsi* pro quamvis, *familiaribus*, scilicet yconomicis …’; the illumination of this MS is in itself a commentary . The following description derives from an on site inspection [14/4/86] and the following: a mostra: ‘Il gotico a Siena: miniature pitture, oreficerie, ogetti d’arte’, Siena, Pal. Pubbl. 24 July – 30 Oct 1982 [published as Siena, Palazzo Pubblico, *Il Gotico a Siena* Firenze 1882 p.234]. I also owe thanks to Catherine Harding for the following reference: Hans Belting ‘Das Bild als Text’ in his *Malerei und Stadkultur im Zeitalter Dantes* [Munich 1989] pp. 55-56. Belting attributes the miniature on the ‘frontispiece’ to Ambrogio Lorenzetti’s brother, Pietro and dates it to about the same time as the ‘Good and Bad government’ frescoes in the Sala dei Nove, Palazzo Pubblico. The Italian quotations in what follows come from, *Il Gotico a Siena* Firenze 1882 p.234. Folio 1 contains an elaborate set of scenes: across the top of the page is a scene of the orator making gestures, probably in accordance with the *pronuntiatio* advice whilst students are listening, speaking and gesticulating [‘La scena è riquadrata da una cornice composta da profilature verdi che includono un campo color minio decorato con piccoli rombi bianchi. Negli angoli il campo interno della cornice si interrompe ed è sostituito da quadrati d’oro. Il fondo interno della miniatura è anch’esso d’oro. La miniature rappresenta un oratore vestito di rosa chiaro con manto e cappello bordato di vaio, in piede su un basso podio celeste di forma circolare, dietro al quale è accostato un sedile bianco. Ventisei giovani elegantoni secondo la moda degli anni intorno al 1335-38 ascoltano o discutono animatamente tra di loro…’; this ‘lezione di retorica’ ‘è una tra le più straordinarie miniature della prima metà del Trecento senese e dopo quella di Simone Martini dell’Ambrosiana e quella del codice dantesco di Perugia (##64 and 81 in this catalogue)… L’autore mostra … di essere stato in stretto rapporto con Pietro Lorenzetti’; in Rome in 1953 the MS was shown as ‘di ambiente fiorentino della prima metà del Trecento con forti influssi senesi. La De Benedictis [1976] lo catalogo come scuola del Tegliacci’]. There is a gold and multi-coloured border around the page, with a bearded head and flowers [‘Un fregio fogliaceo, interrotto in basso da un piccolo drago e cosparso di gocce d’oro si svolge lungo tre margini del folgio e gira con dei prolungamenti sul quarto margine, terminando nella parte alta con una scia di gocce dorate e in basso con una maschera grottesca’ – the border being similar to that found in MS Flor. BML pl.40.3]. Below the top scene, to the left, is the [red] title ‘Martii Tulii Ciceronis ad Gaium Herennium amicum suum rethoricorum liber primus incipit’; below that [and to its right] is a scene with a young lady holding flowers with both hands, in her lap [‘una giovanne donna tiene con entrambe le mani il grembo della verste ricolmo di fiori’]. Below that is the first column of the text and to the right, and below the main top scene, is the second column of the text. On fol.7vb there is a full length young queen gesticulating, in a pink robe with a white and gold border. On fol.19rb there is a bare-headed young man holding a mattock or pick [‘giovane contadino con una zappa’]; on f.22va [at Ad Her 3.9.16] we find another young queen, bust only; on f.23rb [at Ad Her 3.11.19] a bearded king gesticulates and holds a small sceptre; on f.25rb [at Ad Her 3.16.28] a young king with two faces (grave and mild?) holds an orb and gesticulates; on f.28ra [at Ad Her 4] a young man with blue and red cape represents a lover with a posy of flowers, gesticulating towards his heart; on 32va [at Ad Her 4.13.19] a similar figure holds two posies of flowers and appears to gesticulate with them; on f.40ra [at Ad Her 4.35.47] a similar figure portrayed to the waist only [the others being portrayed to their knees] again holds two posies of flowers; on f.46vb [at Ad Her 4.56.69 ‘omnes rationes’] a balding, bearded man in the same colours as the queen at f.7vb [‘in rosa’] holds a large book with two clasps on its cover in his hand. The miniatures are all in multi-colour with gold. One may conclude from all this that an anonymous, technocratic rhetorical text associated with the period Cicero’s youth, lacunose and stylistically impoverished as it is, was felt to be worthy of the most elaborate illuminative décor and that this décor had to do with the classroom, kings and queens, lovers, old and young men, all using the ‘flowers’ of rhetoric for their several purposes. The depiction of a young man with an agricultural implement may suggest a link between culture and tilth, as in Cicero’s *De senectute*… All this is ornamental, but may be compared with the miniatures added to books of hours, designed to illustrate, attract and instruct]

# Venezia

# Biblioteca Nazionale Marciana

**XIII, 59 (4540) xv**

Ad Her

[Ad Her] s-gl (various hh, not scribal; the border and initial ‘E’ on f.1r are multi-coloured with gold; the initial contains an image of a rather graved-faced cowled scholar [?] holding a book, portrayed from the waist up)

get copies of illustrations

# Venezia

# Biblioteca Nazionale Marciana

**XIII, 84 (3997) xv**

[Ad Her] comm incompl (Guarino da Verona; inc. ‘solebant in exponendis libris preponere quedam extrinsecus et intrinsecus…’ / ‘negotium interdum est opera laboriosa nunc vero occupatio…’)

# Venezia

# Biblioteca Nazionale Marciana

**XIII, 84 (3997)**

Banker Diss. pp.269-70 says that in the 1330’s to 1347, Giovanni da Soncino, Professor of Grammar and Rhetoric at Bologna, lectured on the *Ad Herennium*, Bibl. Marc. Venice lat, Cl.XIII (4308) fols 71-118r; see L.Frati ‘I *Flores vertitatis grammaticae* di M. Bertolucci’ *Archivum Romanicum* 8 (1924) pp.317-24; if this is genuine, add to survey oin ch. 4(a)

# Venezia

# Biblioteca Nazionale Marciana

**XIV, 68 (4308) xv** (texts in MS mention various dates, from 1412 to 1490)

[Ad Her E] exord (Barzizza)

[Ad Her E] comm (Barzizza, on Ad Her 4.19-68: ‘cum semper exornationes verborum atque sententiarum omnibus conveniat [= conveniant] partibus orationis …’)

# Venezia

# Biblioteca Nazionale Marciana

**XIV, 69 (4707) xv**

[De inv / Ad Her] cn (‘nota quod rhetorica est ars apposita seu inventa ad persuadendum …’; fols 101-08)

[Ad Her E] comm (on 4.9.13-34.45 ‘collores Tullii glosati…*in mediocri figura etc.* proponens exemplum in mediocri figura premittit primo quid sit observandum …’; fols 111-118 and probably not originally associated with other items in the MS)

# Venezia

# Biblioteca Nazionale Marciana

# XIV, 286 (4302) xv-xix

# [Ad Her] acc (Raph. Regius, ‘quaestio utrum ars rhetorica ad Herennium Ciceroni falso ascribatur…. s.xvi; see Murphy and Winterbottom, *Rhetorica* 17:1 [1999])

# Venezia

# Biblioteca Nazionale Marciana

**XIV, 335 (10,704) xv**

Ad Her E (bk 3.14 to end; the MS is a series of booklets of which the first is this and it is not part of the others in either gathering, script or format)

[Ad Her E] s-gl (non-scribal various hh, curious charter-like ascenders; fols 1-36v; f.36v: ‘explicit liber Tulii Rethoricorum per manus fratris Mathie de Germania, alias de Olomocz sive de rethoricis’; Zorzanello [III (1985) p.570] mentions Hoepli’s identification of this Matthew with the printer Mathias Moravus who printed at Genoa and Naples 1474-92. Scholderer [*Cat.Inc. B.M.* pt. IV (1930) p.XLI *et seqq*] accepts this, but note that our MS says Matthew is a .brother., which the printer was not, or is not so called…)

# Venezia

# Biblioteca Nazionale Marciana

**Z.L. 421 (XCVIII.6 rec.XXIV; 1910) xiv**

De inv

[De inv] s-gl (apart from a large formal scribal gloss on civilis quedam ratio f.3v ‘dixit *videtur dicendum de genere ipsius artis, de officio etc cetera*. Nunc quod proposuit exequitur, scilicet ostendit primum in quo genere rethorica scientia ponatur et deinde de ceteris. Et sciendum est non ita debere accipere hic genus ut phylosophi accipiunt scilicet sub quo species continetur quamvis etiam philosophicum videatur esse quia species sub ipso ponuntur sed accipitur hoc genus in qualitate et quantitate sicut cum dicitur “ cuius generis est vestis ista?” i,e cuius qualitatis, i.e. proprietatis. Ostendit enim qualitatem huius sciencie cum dicit quia pars est cuiusdam civilis rationis [and so on, to approximately 4/5 times this length]; various hh; fol.1r carries a ‘frontispiece rather like **XI, 143 [4118]**: under the [red] title is a scene, at left a square brick building with a grill window [or a furnace?], then, to the right, a scholar in a castellated house, sitting, gesticulating and lecturing on a copy of the De inv. which is on a podium in front of him; further to the right are seven students, standing facing the scholar; some are bearded and some young. Below this scene is a multi-coloured initial ‘S’ and the text proper, with ornamented, capitalized initial words touched in yellow, red and blue para marks and red / blue fourished initials in the text, with yellow touching; headings in similar style)

get copies of these illustrations

# Venezia

# Biblioteca Nazionale Marciana

**Z.L. 422 (Bess. XCVII.7 1883) xv** (with Boethius De diff.top. IV)

De inv

Ad Her

# Venezia

# Biblioteca Nazionale Marciana

**Z.L. 423 (XCVII.7 rec. XXV; 1853) xiv**

Ad Her incompl

[Ad Her incompl] s-gl (and corrections; non-scribal; various hh)

# Venezia

# Biblioteca Nazionale Marciana

**Z.L. 424 (Bess. XCVIII.6 1884) xiv**

Ad Her

[Ad Her] s-gl

# Venezia

# Biblioteca Nazionale Marciana

**Z.L. 425 (XCVII.7 rec. CXXV; 1854) xv** (JOW 1982 nn: ‘apparently no ‘cum sint….’, at least in obvious places’)

[De inv] comm (Victorinus)

[[De inv comm, Victorinus] s-gl (a few glosses and headings)

# Venezia

# Biblioteca Nazionale Marciana

**Z.L. 497 (Bess. XCVIII.3; 1811) xi (c.1045-63)**

[De inv] comm extr (‘glose super rethoricam Ciceronis de inventione. Cicero duplex esse honestum persuadet unum solum atque purum…’ being a few simple notes on terms in the De inv in the main paraphrased from Victorinus; fols 105vb-106vb, four columns only)

**Venezia**

**Museo Civico Correr, Biblioteca**

**854 (VI.669) xv**

[Ad Her] comm (Bartolinus; ‘Iustinianus Christianissimus imperator dicit in nomine ….’)

**Venezia**

**Museo Civico Correr, Biblioteca**

**1036 xv (1423?** POK *Iter* II p.287)

Ad Her

glossed? Check

## Venice: see Venezia

## Verona

## Biblioteca Capitolare

**CLVIII xv**

Ad Her

[Ad Her] s-gl (‘exercitiis occupationibus…’ [on *negotiis*] / ‘studium est vehemens applicatio animi ad aliquid…’)

## Verona

**Biblioteca Capitolare**

## CCLXIII (365) xv (= 30?)

[Ad Her] acc (Guarino da Verona; Guarini Veronensis in lectione rhetorice prefacio … Ferrarie’)

[Ad Her] inaug (Guarino da Verona; ‘oratio in rhetolicam [sic] novam Ciceronis’)

[Ad Her] ex (Guarino da Verona; ‘Guarinus, exempla in arte oratoria’)

## Verona

**Biblioteca Capitolare**

## CCLXVIII (formerly CLV365) xiv (1329)

Florilegium with extracts from De inv / Ad Her??

If so add to survey in ch. 4(a)

## Verona

**Biblioteca Capitolare**

**CCLXXIX (235) xv** (POK Iter 2.298) =35?

[Ad Her] comm (‘quamquam mihi nomen oratoris nunquam mi arrogaverim, tunc quia ut dicit Tullius loqui de arte est minimum…’ / ‘[*etsi negotiis*] *etsi* et quoque in principiis cum iudicativo ponuntur…’)

**Vicenza,**

**Biblioteca Comunale (Civica) Bertoliana**

**344 (formerly 3,9,14) xv**

De inv extr (from 1.1-5)

check

**Vicenza,**

**Biblioteca Comunale (Civica) Bertoliana**

**347 (formerly 3,9,17) xv**

Ad Her

[Ad Her] ex (fol.70r 21 lines of verse illustrations of the *colores verborum*)

check

**Vienna: see Wien**

**Vorau (Austria)**

**Bibliotheca Canonia (now Stiftsbibliothek**: POKk p.887)

**277-III xii** (MO I p.309)

Ad Her extr (from bk 4 ‘liber de exornatione verborum et sententiarum’, to which other Ciceronian extracts have been added)

[De inv] comm E (‘si tam agentis…’)

**Vyssi Brod (Hohenfurt, former Czechoslovakia)**

**Klásterní knihovna**

**114 xvi**

Ad Her E (bks ‘2-4 and 5’)

check

**Washington D.C. (U.S.A.)**

**Folger Shakespeare Library**

**V.a.106 (formerly Sm.13.a) xv** (POK Iter 5)

Ad Her

**Washington D.C. (U.S.A.)**

**Library of Congress, Law Library**

**C 5 xv**

Ad Her

check

**Weimar**

**Herzogin Anna Amalia Bibliothek (formerly Zentralbibliothek der deutschen Klassik, Thüringische Landesbibliothek)**

**Q 107 xvii** (POK Iter 3.433a)

[Ad Her] comm (‘annotationes in 4 libros Rh[etoric]orum M.T.Ciceronis ad C.Herennium, dictata a doctiss. M.Renero, Societ. Jesu, in usum suorum discipulorum…praefatio cap.j. inter caeteros libros, quos de arte Rhetorica Tullius conscripsit, quantum ad praecepta artis Rhetoricae obtinet nulli magis sunt utiles…’; conjectured from ep. to JOW from Dr. Kratzsch stellv. Bibliotheksdirektor, 6.1.’87)

**Wellesley College, Wellesley, Massachusetts (U.S.A.)**

**Wellesley College Library**

**Plimpton 492 xv**

[Ad Her] acc ital*

[Ad Her] trans/para ital* (Giamboni etc; Speroni [1994] XCI, CXX)

**Wells-Next-The-Sea, Norfolk, UK: see Holkham Hall**

**Whalley (Lancashire, UK)**

**Stonyhurst College (Society of Jesus)**

**21 (A I 14) xv (1445**; POK Iter 4)

Ad Her

[Ad Her] m-gl (‘Cicero in aliis libris suis pertractans alias materias premitti prohemium in se continens exordium causas que…’)

**Wien**

**Österreichische Nationalbibliothek**

**31 xiv**

Ad Her extr

[Ad Her E] ex (Marbod; not in Leotta….)

check; are the prose definitions there

**Wien**

**Österreichische Nationalbibliothek**

**51-II xii**

De inv incompl

[De inv incompl] s-gl (revealing a knowledge of Grillius)

[De inv incompl] s-gl (**xiv-xv**)

Ad Her

[Ad Her] s-g (**xii-xv**)

**Wien**

**Österreichische Nationalbibliothek**

**116 (Salisb.5) x** (MO I p.310)

De inv

[De inv] s-gl

[De inv] comm (Victorinus)

[De inv] comm E (‘cum sint…’, added between bks 1 and 2 of Victorinus**)**

**Wien**

**Österreichische Nationalbibliothek**

**157 (Philol.149) xii-xiii** (=MO III.2 p.45; Leotta XLI ‘xiv’)

De inv

[De inv] s-gl

Ad Her

[Ad Her] s-gl (mentioning Victorinus and showing interest in the De inv proem)

[De inv] comm E (‘si tam agentis persone quam rei geste…’)

[Ad Her E] ex (Marbod)

[Ad Her] comm E (on 1.3.5 ‘*genera causarum sunt quatuor etc*. incipit tractatus specialis artis rethorice…’; fol.191v)

[De inv] extr/cn (extracts from 2.53.159 etc; various definitions and other gloss material; 154r-v, 192)

**Wien**

**Österreichische Nationalbibliothek**

**165-I (Philol.173) xiii**

De inv incompl

[De inv incompl] s-gl

**Wien**

**Österreichische Nationalbibliothek**

**177-III (Salisb.10.C) xi** (MO I p.311; both texts have been written out so as to make a single work, usually without distinguishing headings; the completed text, a beautiful fair copy in double columns, shows no evidence of use and very few corrections)

De inv E tca

[De inv] comm E tca (Victorinus)

**Wien**

**Österreichische Nationalbibliothek**

**191 (Univ. 397) xv (1425**) (ON ’85 p.91)

De inv

[De inv] s-gl (mentioning Victorinus, the Ad Herennium, Servius on Vergil etc.)

Ad Her

[Ad Her] s-gl (‘Victorinus. Ille suppeditat ocium studio qui studio vacat omnibus aliis pretermissis…’, citing Aristotle *Rhet*., Boethius, Alanus on the *colores*, Cicero’s speeches etc.)

**Wien**

**Österreichische Nationalbibliothek**

**193 (Philol.175) xiii**

De inv

[De inv] s-gl

Ad Her

**Wien**

**Österreichische Nationalbibliothek**

**227 (Philol.206) xv**

Ad Her

**Wien**

**Österreichische Nationalbibliothek**

**240-I (Univ. 396) xii** (MO I p.312)

[De inv / Ad Her] ta-rhet

De inv

[De inv] s-gl (**xii-xv**)

Ad Her

[Ad Her] s-gl (**xiv**)

**Wien**

**Österreichische Nationalbibliothek**

**240-II (Univ. 396) xii-xiii** (MO I p.330)

[De inv] comm incompl (‘circa artem rethoricam ista sunt consideranda, quid ipsa sit…’ / ‘[*etsi etc.*] i.e. quamvis *inpediti famil. negotiis*, i.e impliciti…’; despite the description in *Tabulae I*,33, NOT a MS of Victorinus, but a proto-‘Alanus’ gloss, numbered **XXI** by JOW in the appendix to his ch. in *The Rhetoric of Cicero in its Medieval and Early Renaissance Commentary Tradition* ed. JOW and Virginia Cox [Brill, 2011 p.75])

**Wien**

**Österreichische Nationalbibliothek**

**276 (Philol.386) xii** (MO I p.313)

De inv (fols 1-52v)

[De inv] s-gl

[Ad Her] comm E (on 1 proem ‘Tullius se de V partibus tractaturum proposuerat inventione prima parte exposita…’; see below MS 3147; f.52v)

Ad Her (fols 53-88)

[Ad Her] s-gl (**xii-xv**)

[Ad Her] cn (f.88r - some nn in slightly later h than the MS itself on *apologus*, *fabula* etc)

**Wien**

**Österreichische Nationalbibliothek**

**1147 xii**

Ad Her extr

[Ad Her E] ex (Marbod; Leotta p.XLII)

**Wien**

**Österreichische Nationalbibliothek**

**2521 xii** (MO I p.314; II pp.876-77)

Ad Her E (from bk 4; f.6r-v)

**Wien**

**Österreichische Nationalbibliothek**

**3121 xv**

De inv E (embedded in an epistolary poem, letters, speeches and invectives [including ‘invectiva contra Bononienses qui rebellaverunt (?) se ecclesie’], humanist ‘arengae’, fictitious dialogues, bits on moral philosophy, fragments of classical and pseudo-classical belles-lettres, we find ‘diviso secundum Tullius in fine Rhetorice veteris’ – a tabular summary of the virtues from the De inv)

**Wien**

**Österreichische Nationalbibliothek**

**3147 (Univ. 976) xv (1469)**

De inv

Ad Her

[Ad Her] mi-gl (‘M.T.C. nove rethorice liber primus ad Gayum Herennium incipit; apud poetas prologus, apud oratores prohemium, apud epistolas preluduum…’)

[De inv] comm incompl (Victorinus)

[De inv] comm E (‘cum sint…’)

[De inv] comm (Guillaume de Champeaux? See MS York XVI.M.7; ‘incipit liber rethoricorum’ / ‘in primis materia et intentio huius rethoris, scilicet Ciceronis …’ / ‘*sepe*: daturus precepta de eloquentia quia videbat eam in maximo odio…’)

[Ad Her] comm (Guillaume de Champeaux? See MS York XVI.M.7; ‘etsi in familiaribus negotiis: cum Tullius de V partibus rhetorice se tractaturum…’)

**Wien**

**Österreichische Nationalbibliothek**

**3164 (Philol. 85) xv**

[Ad Her] para (‘hic incipit nova rethorica a Tullio; retorica tracta …’ / ‘rethorica dicta a ‘resis’ quod est ornatus et ‘ycos’ ‘scientia’, quasi scientia de ornatu modo discendi. Est modus artificiosus terminandi civiles questiones et morales tam ratione proprietatum auditorum quam temporum …’)

[Ad Her E] exord (Barzizza)

**Wien**

**Österreichische Nationalbibliothek**

**3205 (Philol. 213) xv (1468)**

Ad Her

glossed?

**Wien**

**Österreichische Nationalbibliothek**

**3206 (Univ. 402) xv (1458)**

[Ad Her] comm (Philippus de Regio; ‘etsi negotiis: antequam veniamus ad tractatum, dicenda est quedam opinio imperitorum qui dicebant rethoricam non esse artem…’ / ’dividit autem hunc tractatum in prohemium et narrationem…’ / ‘et nota quod dicit *negociis familiaribus inpediti*, non intelligitur de *negociis* domesticis…’; f.93v: ‘glose super quarto libro rethoricorum et ultimo novorum Marci Tulii breviter colecte per venerabilem et generosum virum Dominum Philippum de Regio in arte oratoria eximium professorum [‘-em’?] conplevi die 23 Junii in jejunio ego Julianus de Peregrinus [‘-is’?] de Zilio Verone, 1458 amen; [in a contemporary hand:] valet unum ducatum’)

check transcription

**Wien**

**Österreichische Nationalbibliothek**

**3258 (Univ. 395) xv (1456)**

[Ad Her] comm (Bartolinus, inc. ‘felix qui potuit rerum cognoscere causas, Virgilius …’ ‘[*etsi negociis*] dividitur iste liber in duas, in prohemium et tunc tractatum…’)

**Wien**

**Österreichische Nationalbibliothek**

**5254 (Univ. 118*) xv**

[De inv / Ad Her] cn

[Ad Her] exord (‘exordia super rethoricam Ciceronis secundum ordinem locum eius …’)

Ad Her

[Ad Her] mi/s-gl (citing Sallust, Trapezuntius, De inv. etc.)

**Wien**

**Österreichische Nationalbibliothek**

**5256 (Rec. 3141) xv (1462)**

Ad Her

[Ad Her] mi/s-gl (‘rethorica est ars dicendi apposite ad persuadendum, i.e. ars dicendi talia que expediant…’)

**Wien**

**Österreichische Nationalbibliothek**

**DCCCXCIX U38 xii** (M.Denis *Cod. MSS Theologici Bibl. Pal. Vindob. Lat.* (Vienna , 1793-1802) II/3 col. 2160)

Ad Her

De inv

check

**Wien**

**Schottenkloster, Bibliothek**

**224 (53.d.10) xv (1482)**

Ad Her

[Ad Her] s-gl (Hübl *Cat.Cod.MSS qui in Bibl. Mon. B.V.M. ad Scotos Vindob. Serv.* [Vienna and Leipzig, 1899] p.244, #304 ‘interdum glossa interlinearis adest’)

**Winchester**

**Winchester College: the Warden and Fellows’ Library**

**43 xv (**POK *Iter* 4)

[Ad Her] para E (on memory)

check. POK *Iter* 4.

**Wolfenbüttel (Germany)**

**Herzog August Bibliothek**

**68.4. Aug. fo (2649, 190, formerly 68,4 Ms Aug) xv**

De inv

[De inv] mi-gl (inc. ‘civis [=civitas?] est collecta hominum multitudo ad iure vivendum; socius est qui nobis aliquo pacto ad aliquid nobiscum gerendum coniungitur. Amicus est qui michi usu vite….’ [and other definitions from Victorinus]; neat scribal glosses, quite formal with many tables of *partes rhetoricae*, citing and using Victorinus and Boethius; a superb large illuminated vol.)

**Wolfenbüttel (Germany)**

**Herzog August Bibliothek**

**4.11. Aug.4o (2942)-I xi** (MO I pp.314-15)

[De inv] comm E (‘si tam agentis…’)

De inv

[De inv] mi-gl (‘alii in hoc genere materies nullum esse instrumentum et contra Platonem aliter Aristotiles [artem] sed malam quia contra veritatem [?] dixerunt secundum Grillium [ed. Martin 2.19] ast ego bonam esse…’… / ’ de inventione ideo liber hic intitulatur quia in hoc libro primo retoricorum de inventione maxime habetur tractaturus…’ / [*sepe*] dicit ad numerum [*multum*] ad continuationem…’; this is a worn, used volume, with a gloss in 2 or 3 contemporary or **xii** hh; gl hh small, uniform, difficult to read)

Ad Her

[Ad Her] mi-gl (same h as De inv gl; ‘supra in materia rethorica eloquentia condita sapientia ex amici sui Herrennii peticione non refraganda occasione habita intendit plenarie atque perfecte scilicet secundum omnes partes de rhetorica scientia tractare et hoc duabus de causis, scilicet ut in primo libro promisit perficiat atque ut amici sui honeste peticioni satisfaciat utilitati tamen posterorum providens quod non minima est finalis causa. Et notandum est quod in hoc libro quoque de invencione tractat; non est supervacaneum quia aliter plenariam non haberet intencionem secundum amici sui condignam postulationem….’ / ‘hic a suamet persona captat benivolentiam dum dicit se familiaria postponere negocia atque phylosophicam ad tempus…’)

**Wolfenbüttel (Germany)**

**Herzog August Bibliothek**

**4.15. Aug.4o (2946) xiv-xv**

Ad Her

[Ad Her] s-gl (‘triplex est ocium, scilicet animi et ocium corporis…’ / ‘orator est vir bonus dicendi peritus…’; the glosses are in contemporary but difficult hh and are more cursive than text script)

**Wolfenbüttel (Germany)**

**Herzog August Bibliothek**

**4.16. Aug.4o (2947) xv**

De inv E (2.1-8, 116-121 – 2 fols)

**Wolfenbüttel (Germany)**

**Herzog August Bibliothek**

**10.4. Aug.4o (2998) xiv-xv**

Ad Her

[Ad Her] s-gl (occasional [scribal] headings in marg, marg and interlin nn; h different from that of text)

**Wolfenbüttel (Germany)**

**Herzog August Bibliothek**

**22.5. Aug.4o (3259) xv**

Ad Her incompl

**Wolfenbüttel (Germany)**

**Herzog August Bibliothek**

**2. Gud. lat. 2o (192, formerly Gud. Lat.2; Koehler-Milchsack #4306) xiv** (a fine large vol. of Cicero texts, illustrated with busts of scholars / *magistri*; 99va, beg. of Ad Her: a bearded philosopher with bald head, etc.)

De inv

[De inv] s-gl (several later hh)

Ad Her

[Ad Her] s-gl (several later hh)

**Wolfenbüttel (Germany)**

**Herzog August Bibliothek**

**49. Gud. lat. 2o (Koehler-Milchsack #4354) xv**

Ad Her E (1.4-4.7; 15 fols)

[Ad Her E] s-gl (‘ut habere rem cum more…’ / ‘scilicet paupertate operis i.e. tempore vel agraria…’; marginal and interlinear, some textual glosses in red)

**Wolfenbüttel (Germany)**

**Herzog August Bibliothek**

**153. Gud. lat. 4o (Koehler-Milchsack #4457) xiii**

De inv (initial ‘S’ contains a riding knight in a jousting manner)

[De inv] s-gl (later hh)

Ad Her

[Ad Her] s-gl (later hh; different h from that of De inv, but contemporary; last 2 pages of Ad Her gathering contains notes in xii h [?] concerning ecclesiastical lawsuits and mentioning Orleans; also some letters; as this h may well be one of the hh of the later Ad Her glosses, it may indicate an epistolary, judicial context for Ad Her study)

**Wolfenbüttel (Germany)**

**Herzog August Bibliothek**

**183. Gud. lat. 4o (Koehler-Milchsack #4487) xv**

Ad Her (a fine humanist vol., with border containing the bearded face of a man, with a bird [f.15v]; f. 18v has a picture of a rabbit with a scroll on which is written ‘in preterito tempore oportet…’, etc.)

[Ad Her] s-gl (various hh)

**Wolfenbüttel (Germany)**

**Herzog August Bibliothek**

**209. Gud. lat. 4o (Koehler-Milchsack #4514) xv**

Ad Her (occasional corrections)

**Wolfenbüttel (Germany)**

**Herzog August Bibliothek**

**Novi 417 xv** (POK *Iter* 3)

Ad Her

glossed?

**Worcester**

**Cathedral and chapter Library**

**Add.67 n.22 xii** (MO I p.316)

De inv extr (from both bks; 2 fols)

**Worcester**

**Cathedral and chapter Library**

**Q. 79 xv**

[Ad Her E] ex (Marbod; not in Leotta: inf. From Marti Camargo)

**Wroclaw (Breslau, Poland)**

**Biblioteka Uniwersytecka**

**I F 121 xv** (*Die HSS der Staats- und Universitätsbibl. Breslau* Leipzig 1938, vol.1 # 130)

Ad Her

De inv

Add all accents / slashes etc to Wroclaw entries

**Wroclaw (Breslau, Poland)**

**Biblioteka Uniwersytecka**

**I F 244 xv** (information from Emil J.Polak)

[Ad Her] exord (Barzizza)

**Wroclaw (Breslau, Poland)**

**Biblioteka Uniwersytecka**

**IV.F.62 xv** (some folios mention the date 1403; contains, among other items, letters of Peter of Blois, written 1473, etc.)

Ad Her

**Wroclaw (Breslau, Poland)**

**Biblioteka Uniwersytecka**

**R 70 (CXXVIII = S.I.4.21) xii**

De inv

[De inv] mi-gl (inc ‘*sepe* notat temporis frequentiam, *multum* longitudinem; m*ecum* attentionem ipsius cogitationis et ideo hec tria ponit quia quod in publicum deserendum erat, frequenter et continue et diligenter a sapiente prius oportebat considerari. Disertus est ille qui pauca ferit verba et ea caute; disertior ille qui plura ferit non adeo caute; *disertissim*u*s* qui inconsiderate verba expendit. Amicus est….’; contemporary and s.xiii hh)

Ad Her

[Ad Her] s-gl (not by h of De inv gloss)

[De inv] comm E (‘si tam agentis…’; follows Boethius De diff.top.)

**Wroclaw (Breslau, Poland)**

**Biblioteka Uniwersytecka**

**R 71 (CXXXI = S.I.4.22) xiii**

[Ad Her] comm (inc ‘tam apud grecos quam apud latinos artis rethorice constat diversos fuisse scriptores…’ / ‘[*etsi in negociis*] artem dicturus rethoricam Tullius prohemium operi suo prescribit in quo de quo in hoc libro sit agendum….’; an abridged ‘Alanus’ commentary, with an original preface; see Ward n Calboli [ed.] *Papers on Rhetoric* V p.194)

[Ad Her] acc (a repeat of the ‘tam apud grecos’ preface of the previous work)

**Wroclaw (Breslau, Poland)**

**Biblioteka Uniwersytecka**

**R 72 (CXXXVIII = S.I.4.23) xiv+**

De inv

[De inv] s-gl

Ad Her

[Ad Her] s-gl

**Wroclaw (Breslau, Poland)**

**Biblioteka Uniwersytecka**

**R 73 (CXLIX = S.I.4.24) xv (1451-52)**

Ad Her

[Ad Her] s-gl (inc [cropped] ‘ab auditore ibi *et eo studiosius,* ab adversariis ibi *oratoris*…’ / [to M 1.17] ‘hic est color diminucionis…’)

**Wroclaw (Breslau, Poland)**

**Biblioteka Zakladu Narodowego im. Ossolínskich (Ossolineum)**

**742 4o xvii** (POKk p.921 Ketrzynski III p.236)

[Ad Her] extr (? ‘regulae, quibus artificiosae pronuntiationis et actionis ratio continetur, ex Cicerone et Quintiliano praecipue collectae’; a collection on preaching, the bible and theology)

**Wroclaw (Breslau, Poland)**

**Biblioteka Zakladu Narodowego im. Ossolínskich (Ossolineum)**

**2579/I xvi**

[Ad Her] acc (‘prolegomena artis rhetoricae quatuor librorum Marci Tullii Ciceronis ad Herennium’; *Inwentarz*… [POKk p.922 top entry) I MS 1-7325])

**Württembergische Landesbibliothek**: see Stuttgart

**Würzburg**

**Universitätsbibliothek**

**Inc. f.119 (? Or M.ch.q.83?) xv**

Ad Her

Incipit? POK *Iter* VI. If genuine, add to survey in ch. 4(a)

**Würzburg**

**Universitätsbibliothek**

**M.ch.f.60 xiv**

Ad Her

[Ad Her] mi/s-gl (‘rethorica est ut dicunt antiqui ratio discernendi vel dicendi iurisperitorum que propter nitorem et copiam eloquentie maxime in civilibus questionibus est memorabilia [?]. Rhetorica est benedicendi scientia in civilibus questionibus persuadendum iusta et bona dicta, vero grece apothou rethoresin a copia locutionis…’; fols 2-41; on fols 118-153 ‘Gasparini Bergomensis et aliorum orationes’)

**Würzburg**

**Universitätsbibliothek**

**M.ch.q.174 xv (1461-62)**

[Ad Her] ta (fols 1-4)

[De inv / Ad Her] cn (f.6v)

De inv (fols 7-64)

[De inv] s-gl

Ad Her (fols 67-139)

[Ad Her] m-gl (‘exordium in re honesta in genere deliberativo ad constituendam propositionem in causa agenda…’ [ = Gasparino Barzizza? Cf. fol 240v, blank except for, in a cursive h like that the Ad Her gloss, ‘Casparinus aliquis in glosis rethoricis’; cf. also the [Ad Her] exord in MS Stuttgart Württ.Landesbibl. HB VIII 13 fols 189—194v, esp. fol. 189r: ‘exemplum exordii in causa dubia ad captandum benivolenciam. Exordium in re honesta in genere deliberativo ad constituendam propositionem de causa agenda: sic exordiamur…’])

**Würzburg**

**Universitätsbibliothek**

**M.p.misc.f.2 ix** (MO I p.317; ‘Pas de gloses’)

Ad Her incompl

**Würzburg**

**Universitätsbibliothek**

**M.p.misc.f.3 ix** (MO I p.318; ‘Pas de gloses’; Thurn [POKk p.924, 3/1 *Die Pergamenthandschriften* … 1984 pp.120-21 ‘Leserverwerke und Korrekturen verschiedener…’)

De inv incompl

**Würzburg**

**Universitätsbibliothek**

**M.p.misc.f.37 xii**

Ad Her extr (from bk 4; fols 1r-v)

**Würzburg**

**Universitätsbibliothek**

**M.p.th.f.185 ix** (MO I p.318)

De inv E (fols 1-2v; De inv 2.29.90 *autem* – 2.32.100 *quaerere*)

[De inv E] s-gl (**xii**)

**Würzburg**

**Universitätsbibliothek**

**M.p.th.q.45 xiii-xiv**

De inv extr/[De inv]cn (‘excerpta de rethorica Marcii Tullii Ciceronis de libro primo veteris. *Sepe et multum hoc mecum cogitavi etc.* Civitas est collectio hominum secundum ius [?] vivencium. Quintilianus…’; there follow various sentences, definitions etc. ascribed in the margin by the scribe to Victorinus, Tullius, Quintilianus, Tullius contra legistas, Isidorus, with marginal additions an the bottom giving page or chapter references for terms found in rhetorical treatises; fol. 302va; extracts from bk 2 of the De inv are found f.303va)

Ad Her extr /[Ad Her]cn (‘expliciunt extracta de veteri rethorica. Exce[r]pta de nova rethorica. [‘Quintilianus’ in the margin]. *Etsi negociis etc*. Negocium est laboriosum officium. Quintilianus. Negocium dicitur quasi negans ocium. [Only 5 lines, ending] vicium est amico petenti quod iustum est negare et pro eo laborem iustum fugere’)

**York (UK)**

**Cathedral church of St.Peter, Minster Library**

**XVI.M.6 xii** (MO I p.319 [!] and III.2 p.47; the volume has been misbound; it forms part 1 of a pair of matched MSS from the Augustinian abbey of St.Mary-in-the-Fields, Leicester, founded in 1143; part 2 is MS XVI.M.7. the pair form nos 604 and 605 respectively in the medieval [s.xv] catalogue of Leicester abbey)

De inv (fols 12-40v, 97-112v, 89r)

[De inv] s-gl (**xiii-xv**)

Ad Her (89r-96v, 41-88v)

[Ad Her] s-gl (**xiii-xv**)

**York (UK)**

**Cathedral church of St.Peter, Minster Library**

**XVI.M.7 xii (**MO I p.331)

[De inv] comm (Guilelmus de Champeaux? Inc ‘quam greci vocant rethoricam, latini dicunt artificiosam eloquentiam…’ / ‘in primis materia et intentio huius rethoris scilicet Ciceronis querenda est…’ / ‘*sepe*: daturus precepta de eloquentia quia videbat eam in maximo odio…’; fols 1-52)

[Ad Her] comm (Guilelmus de Champeaux? Inc ‘*etsi in familiaribus* [‘*negociis’* in a later h]: cum T[ullius] de V partibus rethorice se tractaturum promiserat inventione prima parte exposita…’; fols 52[51]rb-70[68]vb)

[De inv] comm E (Guilelmus de Champeaux? On De inv 1.7-15, etc.; inc ‘[N]on ignotum sit M[arcum] T[ullium] rectum genus accipere civilem rationem, in designatione rethorice…’; fols 70[68]vb-71[69]vb)

**York (UK)**

**Cathedral church of St.Peter, Minster Library**

**XVI.N.4 xii** (MO III.2 p.47: ‘quelques gloses marginales’ but JOW nn on site do not record any; N.Ker Library of the Augustinian Friars [ = Convent of Austin Friars] *Medieval Libraries of Great Britain* [1964] p.218)

Ad Her incompl

De inv incompl

[De inv] comm E (‘si tam agentis…’)

check for glosses

**York (UK)**

**Cathedral church of St.Peter, Minster Library**

**XVI.I.10 xii-xiii**

De inv / Ad Her

check; Gallick and Alessio, but not included in survey ch. 4(a)

**York (UK)**

**Cathedral church of St.Peter, Minster Library**

**520 xiv (1372)**

De inv / Ad Her

check; Gallick and Alessio, but not included in survey ch. 4(a)

**Zaragoza (Spain)**

**Biblioteca del Real Seminario [Sacerdotal] de San Carlos**

**B-4-7 xv** (POK *Iter* 4 p.667a; POKk *Consejo*… p.14. Called ‘**8**’ in this catalogue and described as ‘Cicero Rhetoricorum libri quarti’; POK *Iter* 4 ‘09460, now B.4.7)

Ad Her

[Ad Her] mi/s-gl (‘inc ‘triplex est negotium, scilicet politicum, monasticum et iconomicum…’ (POK; POKk *Consejo*… p.14: ‘en las primeras 22 hoj. [there are 105 fols in the vol.], las 4 márgenes con comentarios, el resto, nada’; JOW nn reveal this quotation [source unknown] ‘Glosas alrededor del texto, sobre tode en los primeros folios’; POK *Iter* 4: ‘with marginal glosses fairly extensive up to the section on argumentum’)

**Zürich**

**Zentralbibliothek**

**C 58 (275) xii**

[Ad Her E] ex (Marbod; Leotta p.XLII)

**Zürich**

**Zentralbibliothek**

**C 121 xi**

De inv E(1.24.34 – 25.36; fols 71v-73v)

**Zürich**

**Zentralbibliothek**

**C 132 (App.37) xi**

De inv

[De inv] s-gl (**xiv-xvi**; pp. 1-100)

[De inv / Ad Her] cn (p.101)

Ad Her

[Ad Her] s-gl (**xiv-xvi**; pp 102-213)

**Zwettl**

**Zisterzienserstift**

**376 xiv** (POK *Iter* 6) xiii ( last 3rd of 13th c to 1300)

f.1 fragment De arte Rhetorica ‘Circa artem rethoricam X sunt consideranda quid sit genus artis rethorice. Quid ipsa ars …. Expl. … scientia invenienda orationem rethoricam (2r inc) studentibus in arte rethorica Tullius persuadere intendit Expl. Vir bonus et sapiens’; for contents see xeroxed p.254.

[Ad Her] cn (‘adnotationes de arte rethorica…’ by Jannes Reytter, ‘professus in Zwettl’; fols 1-2) = same as above?

Ad Her

De inv

**Zwettl**

**Zisterzienserstift**

**383 xiv (1340)** (IRHT: ‘scr. In Castro floro’)

Ad Her IL and M glosses from late 15th c
